# Supplementary material for: SIRT2 and lysine fatty acylation regulate the transforming activity of K-Ras4a
Source: eLife. 2017 Dec 14;6:e32436. doi: 10.7554/eLife.32436 (PMC5745086; doi:10.7554/eLife.32436)
Supplement: Figure 6—figure supplement 3-source data 1. — Proteins with at least two unique peptides and H/L ratios and shared by all three interactome experiments are shown. Heavy/Light ratios > 1.3 and<0.77 are highlighted. [file elife-32436-fig1.xlsx]

## Sheet: Sheet1
Uniprot Accession	Description	Forward K-Ras4a-G12V-3KR (Heavy)/K-Ras4a-G12V (Light)	Reverse K-Ras4a-G12V (Heavy)/K-Ras4a-G12V-3KR (Light)	K-Ras4a-G12V Ctrl KD/K-Ras4a-G12V Sirt2 KD
B1AU25	Apoptosis-inducing factor 1, mitochondrial OS=Mus musculus GN=Aifm1 PE=1 SV=1 - [B1AU25_MOUSE]	21.11	0.690273	1.56974
Q3U0V2	Tumor necrosis factor receptor type 1-associated DEATH domain protein OS=Mus musculus GN=Tradd PE=1 SV=1 - [TRADD_MOUSE]	3.05202	0.588872	1.82754
E9Q616	Protein Ahnak OS=Mus musculus GN=Ahnak PE=1 SV=1 - [E9Q616_MOUSE]	2.00646	0.484463	2.12926
E9Q0U7	Heat shock protein 105 kDa OS=Mus musculus GN=Hsph1 PE=1 SV=1 - [E9Q0U7_MOUSE]	1.64589	0.610748	2.59184
Q9R112	Sulfide:quinone oxidoreductase, mitochondrial OS=Mus musculus GN=Sqrdl PE=1 SV=3 - [SQRD_MOUSE]	1.54824	0.570745	1.78086
Q91VI7	Ribonuclease inhibitor OS=Mus musculus GN=Rnh1 PE=1 SV=1 - [RINI_MOUSE]	1.43564	0.754653	1.87298
P10107	Annexin A1 OS=Mus musculus GN=Anxa1 PE=1 SV=2 - [ANXA1_MOUSE]	1.36431	0.671585	4.03346
E9Q133	T-complex protein 1 subunit gamma OS=Mus musculus GN=Cct3 PE=1 SV=1 - [E9Q133_MOUSE]	1.33994	0.616616	1.78472
P04627	Serine/threonine-protein kinase A-Raf OS=Mus musculus GN=Araf PE=1 SV=2 - [ARAF_MOUSE]	1.33277	0.548101	1.3307
G3XA21	MCG134445, isoform CRA_a OS=Mus musculus GN=Mroh1 PE=1 SV=1 - [G3XA21_MOUSE]	4.07781	1.18578	0.054306
Q9QYJ0	DnaJ homolog subfamily A member 2 OS=Mus musculus GN=Dnaja2 PE=1 SV=1 - [DNJA2_MOUSE]	3.32017	0.817542	2.07383
Q8BJU0	Small glutamine-rich tetratricopeptide repeat-containing protein alpha OS=Mus musculus GN=Sgta PE=1 SV=2 - [SGTA_MOUSE]	3.24825	3.61863	1.61993
P63037	DnaJ homolog subfamily A member 1 OS=Mus musculus GN=Dnaja1 PE=1 SV=1 - [DNJA1_MOUSE]	1.94597	0.353103	1.10809
D6REF7	Sphingosine-1-phosphate lyase 1 OS=Mus musculus GN=Sgpl1 PE=1 SV=1 - [D6REF7_MOUSE]	1.7721	1.89306	3.77147
Q9CQ65	S-methyl-5'-thioadenosine phosphorylase OS=Mus musculus GN=Mtap PE=1 SV=1 - [MTAP_MOUSE]	1.6595	0.922392	3.69561
Q99KV1	DnaJ homolog subfamily B member 11 OS=Mus musculus GN=Dnajb11 PE=1 SV=1 - [DJB11_MOUSE]	1.61407	0.868187	1.65549
D3Z1M1	Guanine nucleotide-binding protein G(I)/G(S)/G(T) subunit beta-2 (Fragment) OS=Mus musculus GN=Gnb2 PE=1 SV=1 - [D3Z1M1_MOUSE]	1.61072	0.845221	1.39469
P35700	Peroxiredoxin-1 OS=Mus musculus GN=Prdx1 PE=1 SV=1 - [PRDX1_MOUSE]	1.52975	0.783332	2.01119
Q9EPK7	Exportin-7 OS=Mus musculus GN=Xpo7 PE=1 SV=3 - [XPO7_MOUSE]	1.52914	0.873474	1.0517
A2A5R2	Brefeldin A-inhibited guanine nucleotide-exchange protein 2 OS=Mus musculus GN=Arfgef2 PE=1 SV=1 - [BIG2_MOUSE]	1.42505	1.18575	0.569671
Q8VDN2	Sodium/potassium-transporting ATPase subunit alpha-1 OS=Mus musculus GN=Atp1a1 PE=1 SV=1 - [AT1A1_MOUSE]	1.39083	0.830566	1.52102
P37889	Fibulin-2 OS=Mus musculus GN=Fbln2 PE=1 SV=2 - [FBLN2_MOUSE]	1.3697	1.08072	2.62672
F8WGD2	Ras and Rab interactor 2 OS=Mus musculus GN=Rin2 PE=1 SV=1 - [F8WGD2_MOUSE]	1.32077	1.16589	1.01214
P99024	Tubulin beta-5 chain OS=Mus musculus GN=Tubb5 PE=1 SV=1 - [TBB5_MOUSE]	1.31715	0.809505	1.49824
Q07113	Cation-independent mannose-6-phosphate receptor OS=Mus musculus GN=Igf2r PE=1 SV=1 - [MPRI_MOUSE]	1.28654	1.21973	1.03479
Q922F4	Tubulin beta-6 chain OS=Mus musculus GN=Tubb6 PE=1 SV=1 - [TBB6_MOUSE]	1.28498	0.765657	1.67198
P68372	Tubulin beta-4B chain OS=Mus musculus GN=Tubb4b PE=1 SV=1 - [TBB4B_MOUSE]	1.27391	0.691751	1.70888
P47740	Fatty aldehyde dehydrogenase OS=Mus musculus GN=Aldh3a2 PE=1 SV=2 - [AL3A2_MOUSE]	1.26431	0.91291	1.45088
P46935	E3 ubiquitin-protein ligase NEDD4 OS=Mus musculus GN=Nedd4 PE=1 SV=3 - [NEDD4_MOUSE]	1.22533	0.760587	1.93406
E9QAI5	CAD protein OS=Mus musculus GN=Cad PE=1 SV=1 - [E9QAI5_MOUSE]	1.19642	0.553135	1.69583
Q8BUK6	Protein Hook homolog 3 OS=Mus musculus GN=Hook3 PE=1 SV=2 - [HOOK3_MOUSE]	1.19169	0.942851	1.46979
O70572	Sphingomyelin phosphodiesterase 2 OS=Mus musculus GN=Smpd2 PE=1 SV=1 - [NSMA_MOUSE]	1.17859	0.608121	2.40506
P28658	Ataxin-10 OS=Mus musculus GN=Atxn10 PE=1 SV=2 - [ATX10_MOUSE]	1.17606	0.696481	1.35525
Q6ZQ73	Cullin-associated NEDD8-dissociated protein 2 OS=Mus musculus GN=Cand2 PE=1 SV=2 - [CAND2_MOUSE]	1.17517	0.741377	1.8848
Q8BKC5	Importin-5 OS=Mus musculus GN=Ipo5 PE=1 SV=3 - [IPO5_MOUSE]	1.16665	1.14594	1.19396
Q924C1	Exportin-5 OS=Mus musculus GN=Xpo5 PE=1 SV=1 - [XPO5_MOUSE]	1.15828	1.10627	4.91258
Q6ZQ38	Cullin-associated NEDD8-dissociated protein 1 OS=Mus musculus GN=Cand1 PE=1 SV=2 - [CAND1_MOUSE]	1.15771	0.627251	1.6568
Q6A099	MKIAA0248 protein (Fragment) OS=Mus musculus GN=Gbf1 PE=1 SV=1 - [Q6A099_MOUSE]	1.14944	0.862055	1.9917
O55143	Sarcoplasmic/endoplasmic reticulum calcium ATPase 2 OS=Mus musculus GN=Atp2a2 PE=1 SV=2 - [AT2A2_MOUSE]	1.12162	0.895489	1.55019
Q8VCI5	Peroxisomal biogenesis factor 19 OS=Mus musculus GN=Pex19 PE=1 SV=1 - [PEX19_MOUSE]	1.11834	0.978793	3.73405
E9PVA8	Protein Gcn1l1 OS=Mus musculus GN=Gcn1l1 PE=1 SV=1 - [E9PVA8_MOUSE]	1.09961	1.09932	1.33385
P58252	Elongation factor 2 OS=Mus musculus GN=Eef2 PE=1 SV=2 - [EF2_MOUSE]	1.09814	0.586828	2.16934
Q9CQC6	Basic leucine zipper and W2 domain-containing protein 1 OS=Mus musculus GN=Bzw1 PE=1 SV=1 - [BZW1_MOUSE]	1.09458	1.06718	0.830632
Q9JHU4	Cytoplasmic dynein 1 heavy chain 1 OS=Mus musculus GN=Dync1h1 PE=1 SV=2 - [DYHC1_MOUSE]	1.09265	0.851143	1118.57
Q9D8N0	Elongation factor 1-gamma OS=Mus musculus GN=Eef1g PE=1 SV=3 - [EF1G_MOUSE]	1.06233	0.966627	2.53481
Q07813	Apoptosis regulator BAX OS=Mus musculus GN=Bax PE=1 SV=1 - [BAX_MOUSE]	1.05023	0.00178571	1.64752
Q61753	D-3-phosphoglycerate dehydrogenase OS=Mus musculus GN=Phgdh PE=1 SV=3 - [SERA_MOUSE]	1.04061	1.06892	1.9337
Q8VI75	Importin-4 OS=Mus musculus GN=Ipo4 PE=1 SV=1 - [IPO4_MOUSE]	1.03357	0.896671	2.6463
P47758	Signal recognition particle receptor subunit beta OS=Mus musculus GN=Srprb PE=1 SV=1 - [SRPRB_MOUSE]	1.02883	0.0485143	1.11429
H3BKT5	Adenosylhomocysteinase OS=Mus musculus GN=Ahcyl2 PE=1 SV=1 - [H3BKT5_MOUSE]	1.01588	0.84469	3.6993
Q5SWU9	Acetyl-CoA carboxylase 1 OS=Mus musculus GN=Acaca PE=1 SV=1 - [ACACA_MOUSE]	1.00993	0.942072	2.39048
P32883	GTPase KRas OS=Mus musculus GN=Kras PE=1 SV=1 - [RASK_MOUSE]	1	1.00325	0.999103
G3UWE1	MCG11048, isoform CRA_c OS=Mus musculus GN=Tecr PE=1 SV=1 - [G3UWE1_MOUSE]	0.998098	0.535433	3.51282
P63101	14-3-3 protein zeta/delta OS=Mus musculus GN=Ywhaz PE=1 SV=1 - [1433Z_MOUSE]	0.98885	0.87384	1.59104
Q8VC30	Triokinase/FMN cyclase OS=Mus musculus GN=Tkfc PE=1 SV=1 - [TKFC_MOUSE]	0.972917	1.31959	1.89793
P56480	ATP synthase subunit beta, mitochondrial OS=Mus musculus GN=Atp5b PE=1 SV=2 - [ATPB_MOUSE]	0.967155	1.21569	2.07513
Q99L45	Eukaryotic translation initiation factor 2 subunit 2 OS=Mus musculus GN=Eif2s2 PE=1 SV=1 - [IF2B_MOUSE]	0.964944	0.937511	1.84056
P68254	14-3-3 protein theta OS=Mus musculus GN=Ywhaq PE=1 SV=1 - [1433T_MOUSE]	0.957092	0.54782	2.00603
Q4VA53	Sister chromatid cohesion protein PDS5 homolog B OS=Mus musculus GN=Pds5b PE=1 SV=1 - [PDS5B_MOUSE]	0.948983	0.785798	0.843178
Q9JKF1	Ras GTPase-activating-like protein IQGAP1 OS=Mus musculus GN=Iqgap1 PE=1 SV=2 - [IQGA1_MOUSE]	0.93731	0.741936	1.70668
Q91YQ5	Dolichyl-diphosphooligosaccharide--protein glycosyltransferase subunit 1 OS=Mus musculus GN=Rpn1 PE=1 SV=1 - [RPN1_MOUSE]	0.933437	0.643227	2.10367
Q3UYI5	Ral guanine nucleotide dissociation stimulator-like 3 OS=Mus musculus GN=Rgl3 PE=1 SV=2 - [RGL3_MOUSE]	0.925363	0.60448	1.20568
Q4FE56	Probable ubiquitin carboxyl-terminal hydrolase FAF-X OS=Mus musculus GN=Usp9x PE=1 SV=1 - [Q4FE56_MOUSE]	0.925307	0.041335	1.21118
P10126	Elongation factor 1-alpha 1 OS=Mus musculus GN=Eef1a1 PE=1 SV=3 - [EF1A1_MOUSE]	0.913501	0.694578	1.45395
Q8BFY9	Transportin-1 OS=Mus musculus GN=Tnpo1 PE=1 SV=2 - [TNPO1_MOUSE]	0.903229	1.02526	0.992754
P62830	60S ribosomal protein L23 OS=Mus musculus GN=Rpl23 PE=1 SV=1 - [RL23_MOUSE]	0.902324	1.06315	2.25025
Q8BFW7	Lipoma-preferred partner homolog OS=Mus musculus GN=Lpp PE=1 SV=1 - [LPP_MOUSE]	0.898247	0.658146	940.26
E9Q390	Myoferlin OS=Mus musculus GN=Myof PE=1 SV=2 - [E9Q390_MOUSE]	0.891059	0.79021	1.26924
Q9D1M0	Protein SEC13 homolog OS=Mus musculus GN=Sec13 PE=1 SV=3 - [SEC13_MOUSE]	0.889052	0.398383	2.1158
Q61193	Ral guanine nucleotide dissociation stimulator-like 2 OS=Mus musculus GN=Rgl2 PE=1 SV=2 - [RGL2_MOUSE]	0.881164	0.682349	2.68346
P51881	ADP/ATP translocase 2 OS=Mus musculus GN=Slc25a5 PE=1 SV=3 - [ADT2_MOUSE]	0.87534	0.637898	1.64808
Q8VEM8	Phosphate carrier protein, mitochondrial OS=Mus musculus GN=Slc25a3 PE=1 SV=1 - [MPCP_MOUSE]	0.869402	0.736891	1.27924
Q64310	Surfeit locus protein 4 OS=Mus musculus GN=Surf4 PE=1 SV=1 - [SURF4_MOUSE]	0.868262	0.832304	1.68921
Q76MZ3	Serine/threonine-protein phosphatase 2A 65 kDa regulatory subunit A alpha isoform OS=Mus musculus GN=Ppp2r1a PE=1 SV=3 - [2AAA_MOUSE]	0.863321	0.764309	1.8678
Q922B2	Aspartate--tRNA ligase, cytoplasmic OS=Mus musculus GN=Dars PE=1 SV=2 - [SYDC_MOUSE]	0.861107	1.56531	2.07688
Q80UU9	Membrane-associated progesterone receptor component 2 OS=Mus musculus GN=Pgrmc2 PE=1 SV=2 - [PGRC2_MOUSE]	0.86068	0.900825	2.60874
Q6IRU2	Tropomyosin alpha-4 chain OS=Mus musculus GN=Tpm4 PE=1 SV=3 - [TPM4_MOUSE]	0.837816	1.37002	100.864
Q99N57	RAF proto-oncogene serine/threonine-protein kinase OS=Mus musculus GN=Raf1 PE=1 SV=2 - [RAF1_MOUSE]	0.833251	0.927238	1.85629
P38647	Stress-70 protein, mitochondrial OS=Mus musculus GN=Hspa9 PE=1 SV=3 - [GRP75_MOUSE]	0.831736	0.765255	1.74909
Q6P5F9	Exportin-1 OS=Mus musculus GN=Xpo1 PE=1 SV=1 - [XPO1_MOUSE]	0.823765	1.20141	1.48942
P11499	Heat shock protein HSP 90-beta OS=Mus musculus GN=Hsp90ab1 PE=1 SV=3 - [HS90B_MOUSE]	0.818778	0.653259	2.58453
Q921Q7	Ras and Rab interactor 1 OS=Mus musculus GN=Rin1 PE=1 SV=1 - [RIN1_MOUSE]	0.818114	1.14824	2.68845
P62259	14-3-3 protein epsilon OS=Mus musculus GN=Ywhae PE=1 SV=1 - [1433E_MOUSE]	0.812661	0.848146	1.53103
A2AVJ7	Ribosome-binding protein 1 OS=Mus musculus GN=Rrbp1 PE=1 SV=1 - [A2AVJ7_MOUSE]	0.809565	1.41317	5.03886
P48962	ADP/ATP translocase 1 OS=Mus musculus GN=Slc25a4 PE=1 SV=4 - [ADT1_MOUSE]	0.804831	0.571054	2.18278
Q922R8	Protein disulfide-isomerase A6 OS=Mus musculus GN=Pdia6 PE=1 SV=3 - [PDIA6_MOUSE]	0.804637	1.1658	392.799
P62908	40S ribosomal protein S3 OS=Mus musculus GN=Rps3 PE=1 SV=1 - [RS3_MOUSE]	0.794413	1.28099	2.06741
Q99K51	Plastin-3 OS=Mus musculus GN=Pls3 PE=1 SV=3 - [PLST_MOUSE]	0.790552	0.80983	3.68953
Q7TPV4	Myb-binding protein 1A OS=Mus musculus GN=Mybbp1a PE=1 SV=2 - [MBB1A_MOUSE]	0.782606	1.35885	1.5782
P70168	Importin subunit beta-1 OS=Mus musculus GN=Kpnb1 PE=1 SV=2 - [IMB1_MOUSE]	0.782322	1.13224	1.26059
Q6ZWX6	Eukaryotic translation initiation factor 2 subunit 1 OS=Mus musculus GN=Eif2s1 PE=1 SV=3 - [IF2A_MOUSE]	0.77106	1.03708	1.86392
P61358	60S ribosomal protein L27 OS=Mus musculus GN=Rpl27 PE=1 SV=2 - [RL27_MOUSE]	0.758576	1.146	2.50261
E9Q3L2	Protein Pi4ka OS=Mus musculus GN=Pi4ka PE=1 SV=1 - [E9Q3L2_MOUSE]	0.756788	1.4098	1.13116
P07356	Annexin A2 OS=Mus musculus GN=Anxa2 PE=1 SV=2 - [ANXA2_MOUSE]	0.749349	0.405312	2.49288
Q99MN1	Lysine--tRNA ligase OS=Mus musculus GN=Kars PE=1 SV=1 - [SYK_MOUSE]	0.733685	1.16225	1.93802
P11983	T-complex protein 1 subunit alpha OS=Mus musculus GN=Tcp1 PE=1 SV=3 - [TCPA_MOUSE]	0.733581	0.552854	2.34041
Q8VBZ3	Cleft lip and palate transmembrane protein 1 homolog OS=Mus musculus GN=Clptm1 PE=1 SV=1 - [CLPT1_MOUSE]	0.733466	0.572428	2.60027
P35979	60S ribosomal protein L12 OS=Mus musculus GN=Rpl12 PE=1 SV=2 - [RL12_MOUSE]	0.728873	1.24534	2.2256
P62717	60S ribosomal protein L18a OS=Mus musculus GN=Rpl18a PE=1 SV=1 - [RL18A_MOUSE]	0.728374	1.2517	2.09404
P14148	60S ribosomal protein L7 OS=Mus musculus GN=Rpl7 PE=1 SV=2 - [RL7_MOUSE]	0.726436	1.46197	2.23812
A0A0N4SV00	T-complex protein 1 subunit eta OS=Mus musculus GN=Cct7 PE=1 SV=1 - [A0A0N4SV00_MOUSE]	0.72087	0.980671	2.18065
Q9D0I9	Arginine--tRNA ligase, cytoplasmic OS=Mus musculus GN=Rars PE=1 SV=2 - [SYRC_MOUSE]	0.717138	1.51137	2.14843
P19253	60S ribosomal protein L13a OS=Mus musculus GN=Rpl13a PE=1 SV=4 - [RL13A_MOUSE]	0.715494	1.16168	2.27462
Q61081	Hsp90 co-chaperone Cdc37 OS=Mus musculus GN=Cdc37 PE=1 SV=1 - [CDC37_MOUSE]	0.714979	1.04217	1.7094
A0A0K0K1F1	Histone deacetylase 6 (Fragment) OS=Mus musculus GN=Hdac6 PE=1 SV=1 - [A0A0K0K1F1_MOUSE]	0.710946	1.17108	4.35274
P14873	Microtubule-associated protein 1B OS=Mus musculus GN=Map1b PE=1 SV=2 - [MAP1B_MOUSE]	0.710707	0.792504	3.33994
E9PZB3	Protein Gm5093 OS=Mus musculus GN=Gm5093 PE=1 SV=1 - [E9PZB3_MOUSE]	0.696167	1.22026	2.28335
Q9Z0N1	Eukaryotic translation initiation factor 2 subunit 3, X-linked OS=Mus musculus GN=Eif2s3x PE=1 SV=2 - [IF2G_MOUSE]	0.691549	1.21409	1.63429
Q3U1J4	DNA damage-binding protein 1 OS=Mus musculus GN=Ddb1 PE=1 SV=2 - [DDB1_MOUSE]	0.680148	0.836563	2.09889
Q61656	Probable ATP-dependent RNA helicase DDX5 OS=Mus musculus GN=Ddx5 PE=1 SV=2 - [DDX5_MOUSE]	0.678519	0.964556	2.19895
P20029	78 kDa glucose-regulated protein OS=Mus musculus GN=Hspa5 PE=1 SV=3 - [GRP78_MOUSE]	0.660768	0.974545	2.606
O09167	60S ribosomal protein L21 OS=Mus musculus GN=Rpl21 PE=1 SV=3 - [RL21_MOUSE]	0.659296	1.22878	2.4836
P09405	Nucleolin OS=Mus musculus GN=Ncl PE=1 SV=2 - [NUCL_MOUSE]	0.656342	1.08501	1.91064
Q9JJ28	Protein flightless-1 homolog OS=Mus musculus GN=Flii PE=1 SV=1 - [FLII_MOUSE]	0.650013	1.33833	1.34776
E9QAZ2	Ribosomal protein L15 OS=Mus musculus GN=Gm10020 PE=3 SV=1 - [E9QAZ2_MOUSE]	0.639875	1.25622	2.33434
Q6P1F6	Serine/threonine-protein phosphatase 2A 55 kDa regulatory subunit B alpha isoform OS=Mus musculus GN=Ppp2r2a PE=1 SV=1 - [2ABA_MOUSE]	0.637498	2.38895	1.68652
D3YYM6	40S ribosomal protein S5 (Fragment) OS=Mus musculus GN=Rps5 PE=1 SV=1 - [D3YYM6_MOUSE]	0.635542	1.1064	2.05311
P35980	60S ribosomal protein L18 OS=Mus musculus GN=Rpl18 PE=1 SV=3 - [RL18_MOUSE]	0.63417	1.24155	2.24249
P62264	40S ribosomal protein S14 OS=Mus musculus GN=Rps14 PE=1 SV=3 - [RS14_MOUSE]	0.625687	1.39014	1.82989
P12970	60S ribosomal protein L7a OS=Mus musculus GN=Rpl7a PE=1 SV=2 - [RL7A_MOUSE]	0.619429	1.10878	2.24036
P14115	60S ribosomal protein L27a OS=Mus musculus GN=Rpl27a PE=1 SV=5 - [RL27A_MOUSE]	0.618828	1.2519	2.17155
Q8CGC7	Bifunctional glutamate/proline--tRNA ligase OS=Mus musculus GN=Eprs PE=1 SV=4 - [SYEP_MOUSE]	0.616815	1.44194	2.77277
Q5XJF6	Ribosomal protein OS=Mus musculus GN=Rpl10a PE=1 SV=1 - [Q5XJF6_MOUSE]	0.616494	1.08345	2.57017
P17918	Proliferating cell nuclear antigen OS=Mus musculus GN=Pcna PE=1 SV=2 - [PCNA_MOUSE]	0.61574	0.968444	1.09996
A0A087WPT0	Leucine-rich repeat flightless-interacting protein 1 (Fragment) OS=Mus musculus GN=Lrrfip1 PE=1 SV=1 - [A0A087WPT0_MOUSE]	0.609899	1.03274	1.10702
A2A547	Ribosomal protein L19 OS=Mus musculus GN=Rpl19 PE=1 SV=1 - [A2A547_MOUSE]	0.6047	1.19618	2.06285
Q921L6	Cortactin, isoform CRA_a OS=Mus musculus GN=Cttn PE=1 SV=1 - [Q921L6_MOUSE]	0.604218	1.85857	2.33105
P99027	60S acidic ribosomal protein P2 OS=Mus musculus GN=Rplp2 PE=1 SV=3 - [RLA2_MOUSE]	0.600701	1.18156	2.22954
E9Q9T1	Leucine-rich repeat flightless-interacting protein 1 OS=Mus musculus GN=Lrrfip1 PE=1 SV=2 - [E9Q9T1_MOUSE]	0.596533	1.01719	0.0454103
O54724	Polymerase I and transcript release factor OS=Mus musculus GN=Ptrf PE=1 SV=1 - [PTRF_MOUSE]	0.595326	1.03624	2.21762
Q9CR57	60S ribosomal protein L14 OS=Mus musculus GN=Rpl14 PE=1 SV=3 - [RL14_MOUSE]	0.591995	1.30829	2.22315
P62754	40S ribosomal protein S6 OS=Mus musculus GN=Rps6 PE=1 SV=1 - [RS6_MOUSE]	0.589915	1.175	2.11375
P62849	40S ribosomal protein S24 OS=Mus musculus GN=Rps24 PE=1 SV=1 - [RS24_MOUSE]	0.578456	1.13465	2.53186
Q9D8E6	60S ribosomal protein L4 OS=Mus musculus GN=Rpl4 PE=1 SV=3 - [RL4_MOUSE]	0.576619	1.15881	2.37267
Q9JHJ0	Tropomodulin-3 OS=Mus musculus GN=Tmod3 PE=1 SV=1 - [TMOD3_MOUSE]	0.572018	1.346	1.48826
F6YVP7	Protein Gm10260 OS=Mus musculus GN=Gm10260 PE=3 SV=2 - [F6YVP7_MOUSE]	0.571309	1.23638	2.20056
P97351	40S ribosomal protein S3a OS=Mus musculus GN=Rps3a PE=1 SV=3 - [RS3A_MOUSE]	0.560673	2.01889	2.48326
Q3THE2	Myosin regulatory light chain 12B OS=Mus musculus GN=Myl12b PE=1 SV=2 - [ML12B_MOUSE]	0.554694	1.02619	3.92821
P62301	40S ribosomal protein S13 OS=Mus musculus GN=Rps13 PE=1 SV=2 - [RS13_MOUSE]	0.545614	1.23275	2.04497
P62983	Ubiquitin-40S ribosomal protein S27a OS=Mus musculus GN=Rps27a PE=1 SV=2 - [RS27A_MOUSE]	0.54275	1.7314	1.69656
A0A0G2JEP4	Leucine-rich repeat flightless-interacting protein 2 OS=Mus musculus GN=Lrrfip2 PE=1 SV=1 - [A0A0G2JEP4_MOUSE]	0.54256	1.44881	1.49293
A2AGN7	26S protease regulatory subunit 6A OS=Mus musculus GN=Psmc3 PE=1 SV=1 - [A2AGN7_MOUSE]	0.540457	1.18179	2.32235
P60710	Actin, cytoplasmic 1 OS=Mus musculus GN=Actb PE=1 SV=1 - [ACTB_MOUSE]	0.539557	1.39394	3.34653
P47911	60S ribosomal protein L6 OS=Mus musculus GN=Rpl6 PE=1 SV=3 - [RL6_MOUSE]	0.538724	1.23217	1.9783
Q9WTI7	Unconventional myosin-Ic OS=Mus musculus GN=Myo1c PE=1 SV=2 - [MYO1C_MOUSE]	0.538656	1.52943	1.96761
P62192	26S protease regulatory subunit 4 OS=Mus musculus GN=Psmc1 PE=1 SV=1 - [PRS4_MOUSE]	0.537327	0.771463	2.1486
Q8VDM4	26S proteasome non-ATPase regulatory subunit 2 OS=Mus musculus GN=Psmd2 PE=1 SV=1 - [PSMD2_MOUSE]	0.536133	0.848265	2.11567
Q6P2B1	Transportin-3 OS=Mus musculus GN=Tnpo3 PE=1 SV=1 - [TNPO3_MOUSE]	0.535728	1.02016	1.44979
Q52KR3	Protein prune homolog 2 OS=Mus musculus GN=Prune2 PE=1 SV=2 - [PRUN2_MOUSE]	0.53533	0.849034	2.40707
B8JK33	Heterogeneous nuclear ribonucleoprotein M OS=Mus musculus GN=Hnrnpm PE=1 SV=1 - [B8JK33_MOUSE]	0.53309	1.31211	1.6527
Q9EPL8	Importin-7 OS=Mus musculus GN=Ipo7 PE=1 SV=2 - [IPO7_MOUSE]	0.529734	1.15639	1.20515
P46735	Unconventional myosin-Ib OS=Mus musculus GN=Myo1b PE=1 SV=3 - [MYO1B_MOUSE]	0.528338	1.52528	1.95331
G5E8J9	SCY1-like protein 2 OS=Mus musculus GN=Scyl2 PE=1 SV=1 - [G5E8J9_MOUSE]	0.525221	1.11763	4.33676
Q91VJ4	Serine/threonine-protein kinase 38 OS=Mus musculus GN=Stk38 PE=1 SV=1 - [STK38_MOUSE]	0.518429	1.28421	1.20441
Q3UZ39	Leucine-rich repeat flightless-interacting protein 1 OS=Mus musculus GN=Lrrfip1 PE=1 SV=2 - [LRRF1_MOUSE]	0.516462	1.35027	1.24385
P14685	26S proteasome non-ATPase regulatory subunit 3 OS=Mus musculus GN=Psmd3 PE=1 SV=3 - [PSMD3_MOUSE]	0.514978	0.00178571	2.30988
P14131	40S ribosomal protein S16 OS=Mus musculus GN=Rps16 PE=1 SV=4 - [RS16_MOUSE]	0.514688	1.94744	2.10255
Q8BMK4	Cytoskeleton-associated protein 4 OS=Mus musculus GN=Ckap4 PE=1 SV=2 - [CKAP4_MOUSE]	0.513758	0.878716	1.72432
F7CAZ6	F-actin-capping protein subunit beta (Fragment) OS=Mus musculus GN=Capzb PE=1 SV=1 - [F7CAZ6_MOUSE]	0.512249	0.841767	2.3951
Q60605	Myosin light polypeptide 6 OS=Mus musculus GN=Myl6 PE=1 SV=3 - [MYL6_MOUSE]	0.501269	1.11965	4.2315
P13020	Gelsolin OS=Mus musculus GN=Gsn PE=1 SV=3 - [GELS_MOUSE]	0.491864	1.40655	2.79589
Q5SYD0	Unconventional myosin-Id OS=Mus musculus GN=Myo1d PE=1 SV=1 - [MYO1D_MOUSE]	0.489634	2.00039	3.32641
Q3TXS7	26S proteasome non-ATPase regulatory subunit 1 OS=Mus musculus GN=Psmd1 PE=1 SV=1 - [PSMD1_MOUSE]	0.487592	0.820911	2.00592
Q9WUM4	Coronin-1C OS=Mus musculus GN=Coro1c PE=1 SV=2 - [COR1C_MOUSE]	0.484733	1.30249	2.66924
P62700	Protein yippee-like 5 OS=Mus musculus GN=Ypel5 PE=1 SV=1 - [YPEL5_MOUSE]	0.482472	29.4076	1.87822
P62242	40S ribosomal protein S8 OS=Mus musculus GN=Rps8 PE=1 SV=2 - [RS8_MOUSE]	0.48218	1.33447	2.28289
P47753	F-actin-capping protein subunit alpha-1 OS=Mus musculus GN=Capza1 PE=1 SV=4 - [CAZA1_MOUSE]	0.477586	0.912864	7.41131
F7AI87	26S proteasome non-ATPase regulatory subunit 4 (Fragment) OS=Mus musculus GN=Psmd4 PE=1 SV=1 - [F7AI87_MOUSE]	0.476686	1.01598	2.26099
P47963	60S ribosomal protein L13 OS=Mus musculus GN=Rpl13 PE=1 SV=3 - [RL13_MOUSE]	0.475847	0.743252	2.17423
P84089	Enhancer of rudimentary homolog OS=Mus musculus GN=Erh PE=1 SV=1 - [ERH_MOUSE]	0.468143	2.42106	4.31816
A2BGG7	Nuclease-sensitive element-binding protein 1 (Fragment) OS=Mus musculus GN=Ybx1 PE=1 SV=1 - [A2BGG7_MOUSE]	0.455604	1.06595	2.15253
Q7TMY7	Importin-8 OS=Mus musculus GN=Ipo8 PE=1 SV=3 - [IPO8_MOUSE]	0.453077	1.49534	0.497938
H7BWZ3	Actin-related protein 2/3 complex subunit 3 OS=Mus musculus GN=Arpc3 PE=1 SV=1 - [H7BWZ3_MOUSE]	0.448915	1.45177	1.99602
P59999	Actin-related protein 2/3 complex subunit 4 OS=Mus musculus GN=Arpc4 PE=1 SV=3 - [ARPC4_MOUSE]	0.441851	1.11038	1.97466
P27659	60S ribosomal protein L3 OS=Mus musculus GN=Rpl3 PE=1 SV=3 - [RL3_MOUSE]	0.437035	0.885192	2.28929
